# Supplementary material for: Blood pressure, cardiometabolic traits and cardiovascular events in women with uterine fibroids: a genetic correlation and Mendelian randomization study
Source: bioRxiv or medRxiv preprint supplement (doi:10.1101/2024.04.05.24305381), 2024-04-06
Supplement: Supplementary file [file media-1.pdf]

**Hypertension, cardiometabolic traits and cardiovascular events in women with uterine fibroids: a genetic correlation and Mendelian randomization study– Supplementary material**

Henry et al.,

**Supplementary tables**

| Phenotype                              | Trait | N (Cohort or Cases / Controls) | Study reference (PMID)                                                                                                                                                                                                                                                                   |
|----------------------------------------|-------|--------------------------------|------------------------------------------------------------------------------------------------------------------------------------------------------------------------------------------------------------------------------------------------------------------------------------------|
| Systolic blood pressure                | SBP   | [637578 – 745820]              | 30224653                                                                                                                                                                                                                                                                                 |
| Diastolic blood pressure               | DBP   | [647307 – 757601]              | 30224653                                                                                                                                                                                                                                                                                 |
| Body mass index                        | BMI   | 359983                         | UKBB ( <a href="https://broad-ukb-sumstats-us-east-1.s3.amazonaws.com/round2/additive-tsvs/21001_raw.gwas.imputed_v3.both_sexes.tsv.bgz">https://broad-ukb-sumstats-us-east-1.s3.amazonaws.com/round2/additive-tsvs/21001_raw.gwas.imputed_v3.both_sexes.tsv.bgz</a> )                   |
| Waist-to-hip ratio (adjusted on BMI)   | WHR   | 697734                         | 30239722                                                                                                                                                                                                                                                                                 |
| High-density lipoprotein               | HDL   | 315133                         | UKBB ( <a href="https://broad-ukb-sumstats-us-east-1.s3.amazonaws.com/round2/additive-tsvs/30760_raw.gwas.imputed_v3.both_sexes.varorder.tsv.bgz">https://broad-ukb-sumstats-us-east-1.s3.amazonaws.com/round2/additive-tsvs/30760_raw.gwas.imputed_v3.both_sexes.varorder.tsv.bgz</a> ) |
| Low-density lipoprotein                | LDL   | 343621                         | UKBB ( <a href="https://broad-ukb-sumstats-us-east-1.s3.amazonaws.com/round2/additive-tsvs/30780_raw.gwas.imputed_v3.both_sexes.varorder.tsv.bgz">https://broad-ukb-sumstats-us-east-1.s3.amazonaws.com/round2/additive-tsvs/30780_raw.gwas.imputed_v3.both_sexes.varorder.tsv.bgz</a> ) |
| Triglycerides                          | TG    | 343992                         | UKBB ( <a href="https://broad-ukb-sumstats-us-east-1.s3.amazonaws.com/round2/additive-tsvs/30870_raw.gwas.imputed_v3.both_sexes.varorder.tsv.bgz">https://broad-ukb-sumstats-us-east-1.s3.amazonaws.com/round2/additive-tsvs/30870_raw.gwas.imputed_v3.both_sexes.varorder.tsv.bgz</a> ) |
| Cigarettes per day                     | CPD   | 337334                         | 30643251                                                                                                                                                                                                                                                                                 |
| Smoking initiation                     | SI    | 1232091                        | 30643251                                                                                                                                                                                                                                                                                 |
| Sex hormone-binding globulin           | SHBG  | 312215                         | UKBB ( <a href="https://broad-ukb-sumstats-us-east-1.s3.amazonaws.com/round2/additive-tsvs/30830_raw.gwas.imputed_v3.both_sexes.varorder.tsv.bgz">https://broad-ukb-sumstats-us-east-1.s3.amazonaws.com/round2/additive-tsvs/30830_raw.gwas.imputed_v3.both_sexes.varorder.tsv.bgz</a> ) |
| Coronary artery disease                | CAD   | 60801 / 123504                 | Cardiogram                                                                                                                                                                                                                                                                               |
| Myocardial infarction                  | MI    | 42561 / 123504                 | Cardiogram                                                                                                                                                                                                                                                                               |
| Stroke                                 | AS    | 40585 / 406111                 | 29531354                                                                                                                                                                                                                                                                                 |
| Intracranial aneurysm                  | IA    | 7495 / 71934                   | 33199917                                                                                                                                                                                                                                                                                 |
| Migraine                               | MIG   | 30465 / 143147                 | 36939796                                                                                                                                                                                                                                                                                 |
| Type 2 diabetes                        | T2D   | 74125 / 824006                 | 30297969                                                                                                                                                                                                                                                                                 |
| Spontaneous coronary artery dissection | SCAD  | 1917 / 9292                    | 37248441                                                                                                                                                                                                                                                                                 |
| Fibromuscular dysplasia                | FMD   | [1111 - 1578] / [5049 - 7100]  | 34654805                                                                                                                                                                                                                                                                                 |
| Uterine Fibroids                       | UF    | 35474/ [190825 – 208850]       | 31649266                                                                                                                                                                                                                                                                                 |

**Supp. Table 1:** List of summary statistics leveraged in the study.

| Exposure | Outcome                                | N SNP | BETA (ivw) | SE (ivw) | P (ivw)               | BETA (egger) | SE (egger) | P (egger)             | BETA (weighted median) | SE (weighted median) | P (weighted median)   | Directionality | Directionality P value |
|----------|----------------------------------------|-------|------------|----------|-----------------------|--------------|------------|-----------------------|------------------------|----------------------|-----------------------|----------------|------------------------|
| UFs      | Migraine                               | 23    | -0,002     | 0,001    | $2,7 \times 10^{-01}$ | 0,004        | 0,003      | $2,1 \times 10^{-01}$ | -0,0004                | 0,002                | $8,3 \times 10^{-01}$ | TRUE           | $1,4 \times 10^{-39}$  |
|          | Coronary artery disease                | 18    | -0,05      | 0,03     | $1,1 \times 10^{-01}$ | -0,006       | 0,10       | $9,6 \times 10^{-01}$ | -0,02                  | 0,04                 | $6,2 \times 10^{-01}$ | TRUE           | $7,3 \times 10^{-60}$  |
|          | Myocardial infraction                  | 18    | -0,03      | 0,03     | $4,7 \times 10^{-01}$ | 0,07         | 0,11       | $5,7 \times 10^{-01}$ | -0,01                  | 0,04                 | $7,6 \times 10^{-01}$ | TRUE           | $8,5 \times 10^{-54}$  |
|          | Type 2 diabetes                        | 23    | -0,02      | 0,03     | $6,0 \times 10^{-01}$ | -0,06        | 0,07       | $4,5 \times 10^{-01}$ | -0,04                  | 0,03                 | $1,8 \times 10^{-01}$ | TRUE           | $1,2 \times 10^{-132}$ |
|          | Any stroke                             | 23    | 0,03       | 0,03     | $3,4 \times 10^{-01}$ | -0,004       | 0,06       | $9,5 \times 10^{-01}$ | 0,02                   | 0,04                 | $6,7 \times 10^{-01}$ | TRUE           | $3,5 \times 10^{-120}$ |
|          | Intracranial aneurysm                  | 15    | -0,16      | 0,08     | $4,8 \times 10^{-02}$ | -0,003       | 0,26       | $9,9 \times 10^{-01}$ | -0,10                  | 0,10                 | $3,4 \times 10^{-01}$ | TRUE           | $8,7 \times 10^{-04}$  |
|          | Spontaneous coronary artery dissection | 11    | -0,11      | 0,24     | $6,6 \times 10^{-01}$ | -0,17        | 0,81       | $8,4 \times 10^{-01}$ | 0,07                   | 0,26                 | $8,0 \times 10^{-01}$ | FALSE          | $8,7 \times 10^{-01}$  |
|          | Fibromuscular dysplasia                | 11    | 0,25       | 0,19     | $1,9 \times 10^{-01}$ | -0,04        | 0,59       | $9,4 \times 10^{-01}$ | 0,18                   | 0,26                 | $4,8 \times 10^{-01}$ | TRUE           | $6,8 \times 10^{-01}$  |
| UFs      | Migraine                               | 4     | -0,15      | 1,929    | $9,4 \times 10^{-01}$ | -6,98        | 7,08       | $4,3 \times 10^{-01}$ | 0,26                   | 2,2                  | $9,1 \times 10^{-01}$ | FALSE          | $8,3 \times 10^{-01}$  |
|          | Coronary artery disease                | 22    | -0,01      | 0,04     | $7,8 \times 10^{-01}$ | -0,05        | 0,10       | $5,9 \times 10^{-01}$ | -0,03                  | 0,05                 | $4,5 \times 10^{-01}$ | TRUE           | $7,7 \times 10^{-144}$ |
|          | Myocardial infraction                  | 11    | -0,02      | 0,06     | $7,2 \times 10^{-01}$ | -0,06        | 0,13       | $6,6 \times 10^{-01}$ | -0,03                  | 0,06                 | $5,6 \times 10^{-01}$ | TRUE           | $4,7 \times 10^{-121}$ |
|          | Type 2 diabetes                        | 159   | 0,05       | 0,02     | $1,0 \times 10^{-02}$ | -0,01        | 0,04       | $7,5 \times 10^{-01}$ | 0,01                   | 0,03                 | $6,4 \times 10^{-01}$ | TRUE           | $2,8 \times 10^{-02}$  |
|          | Any stroke                             | 8     | -0,13      | 0,13     | $3,1 \times 10^{-01}$ | 0,69         | 0,93       | $4,9 \times 10^{-01}$ | -0,10                  | 0,10                 | $3,3 \times 10^{-01}$ | TRUE           | $1,3 \times 10^{-41}$  |
|          | Intracranial aneurysm                  | 7     | -0,03      | 0,03     | $3,6 \times 10^{-01}$ | -0,23        | 0,17       | $2,2 \times 10^{-01}$ | -0,01                  | 0,04                 | $7,6 \times 10^{-01}$ | TRUE           | $1,7 \times 10^{-70}$  |
|          | Spontaneous coronary artery dissection | 11    | 0,01       | 0,01     | $3,5 \times 10^{-01}$ | 0,12         | 0,03       | $5,7 \times 10^{-03}$ | 0,02                   | 0,02                 | $2,7 \times 10^{-01}$ | TRUE           | $2,0 \times 10^{-102}$ |
|          | Fibromuscular dysplasia                | 1     |            |          |                       |              |            |                       |                        |                      |                       |                |                        |

**Supp. Table 2:** Bi-directional Mendelian randomization (MR) analyses between UFs vs migraine and cardiovascular diseases.

N SNP: count of SNP used as instrumental variables in the MR analyses, BETA: effect size obtained from inverse variance weighted (IVW), Egger and weighted median MR analyses, SE: standard error of effect size, P: P-value for the association.

## Supplementary figures



**Figure supp 1:** Schematic diagram of the different settings of Mendelian Randomization. **(A)** represents the univariate Mendelian Randomization analysis, used to estimate the causal effect of potential cardiometabolic risk factors. **(B)** represents the bi-directional Mendelian randomization analysis, used to estimate the reverse causality between uterine fibroids and cardiovascular diseases. The genetic variants used were selected with the GWAS significant threshold of  $P < 5 \times 10^{-8}$ .



**Figure sup 2:** Forest plot of the bi-directional Mendelian Randomization between uterine fibroids and some cardiovascular diseases. Beta coefficient of Mendelian Randomization ( $\beta$ ) is represented on the x-axis and range represents the 95 % CI. *P*-value of association for 8 tests adjusted using Bonferroni method is indicated as: \* *P*.*adj* < 0.05. **(A)** represents the MR from UF to cardiovascular diseases. **(B)** represents the MR from cardiovascular diseases to UF.
